# Supplementary material for: Study on the surface charge transfer mechanism induced by dual-electric field mutual inductance
Source: Royal Society of Chemistry journal article supplement (doi:10.1039/d4ta02651a), 2024-01-01
Supplement: d4ta02651a1.pdf [file d4ta02651a1.pdf]

## Supporting Information

### Study on the surface charge transfer mechanism induced by dual- electric field mutual inductance

Changcheng Bao, ‡<sup>a</sup> Min He, ‡<sup>a</sup> Jianping Li, <sup>a</sup> Yili Hu, <sup>a</sup> Yingting Wang, <sup>\*a</sup> Jijie Ma, <sup>\*a, b</sup> and Jianming Wen <sup>\*a, b</sup>

<sup>a</sup> *The Institute of Precision Machinery and Smart Structure, College of Engineering, Zhejiang Normal University, Yingbin Street 688, Jinhua 321004, China*

<sup>b</sup> *Key Laboratory of Intelligent Operation and Maintenance Technology & Equipment for Urban Rail Transit of Zhejiang Province, Zhejiang Normal University, Yingbin Street 688, Jinhua 321004, China*

\*E-mail : [wangyingting@zjnu.edu.cn](mailto:wangyingting@zjnu.edu.cn), [mjj@zjnu.cn](mailto:mjj@zjnu.cn), [wjming@zjnu.cn](mailto:wjming@zjnu.cn)

‡ These authors contributed equally to this work.

#### Content

##### Supplemental Figures

**Fig. S1.** Device design for DEF-TENG and SEF-TENG.

**Fig. S2.** The triboelectric material test of DEF-TENG by open-circuit voltage.

**Fig. S3.** The triboelectric material test of DEF-TENG by transferred charge.

**Fig. S4.** A 3D schematic diagram of the device structure. (a) Rotor, and (b) Stator.

**Fig. S5.** Photographs of (a) a DEF-TENG and its (b) Stator, (c) Chain screw, (d) Rotor, (e) Sleeve, (f) Pedestal.

**Fig. S6.** Schematic diagram of the movement process of DEF-TENG.

**Fig. S7.** The temperature test of DEF-TENG by short-circuit current.

**Fig. S8.** Output waveform of DEF-TENG at the temperature and the humidity are 50°C and 10%.

**Fig. S9.** The effects of humidity on the short-circuit current of DEF-TENG.

**Fig. S10.** The effects of humidity on the transferred charge of DEF-TENG.

**Fig. S11.** Driving stroke influences on the open-circuit voltage of the DEF-TENG.

**Fig. S12.** Diagram of the charging curve of origin DEF-TENG for different capacitors.

**Fig. S13.** Diagram of the charging curve of +Q DEF-TENG for different capacitors.

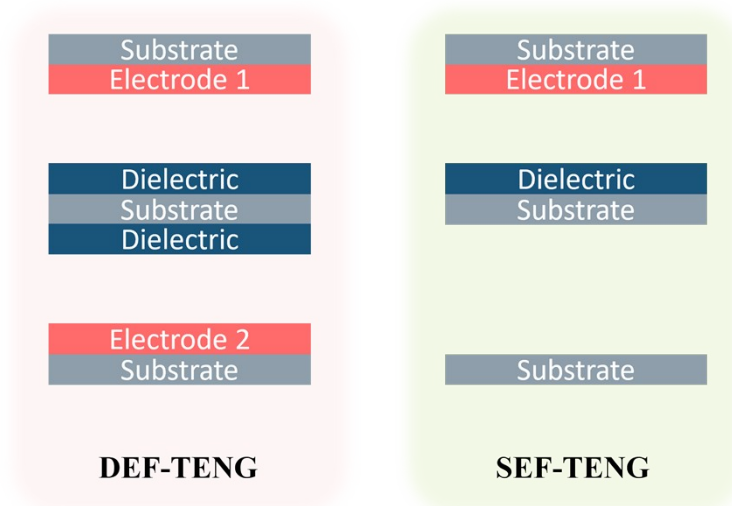

**Fig. S1.** Device design for DEF-TENG and SEF-TENG.

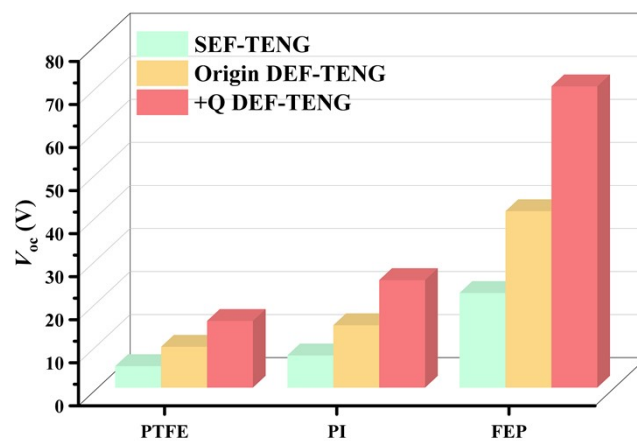

**Fig. S2.** The triboelectric material test of DEF-TENG by open-circuit voltage.

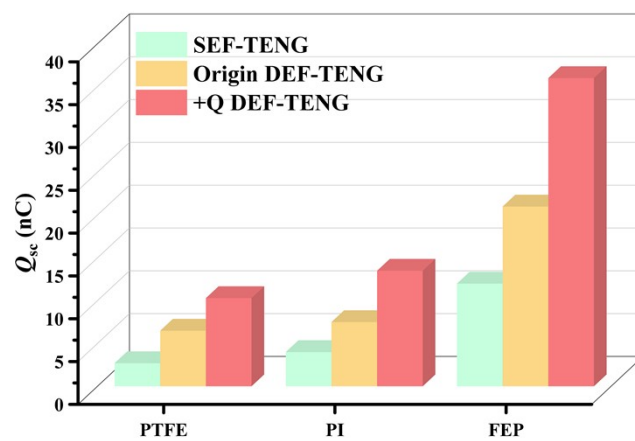

**Fig. S3.** The triboelectric material test of DEF-TENG by transferred charge.

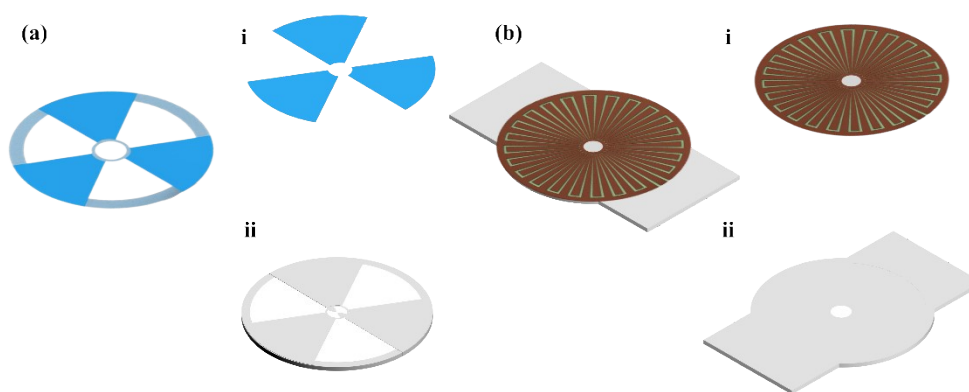

**Fig. S4.** A 3D schematic diagram of the device structure. (a) Rotor, and (b) Stator.

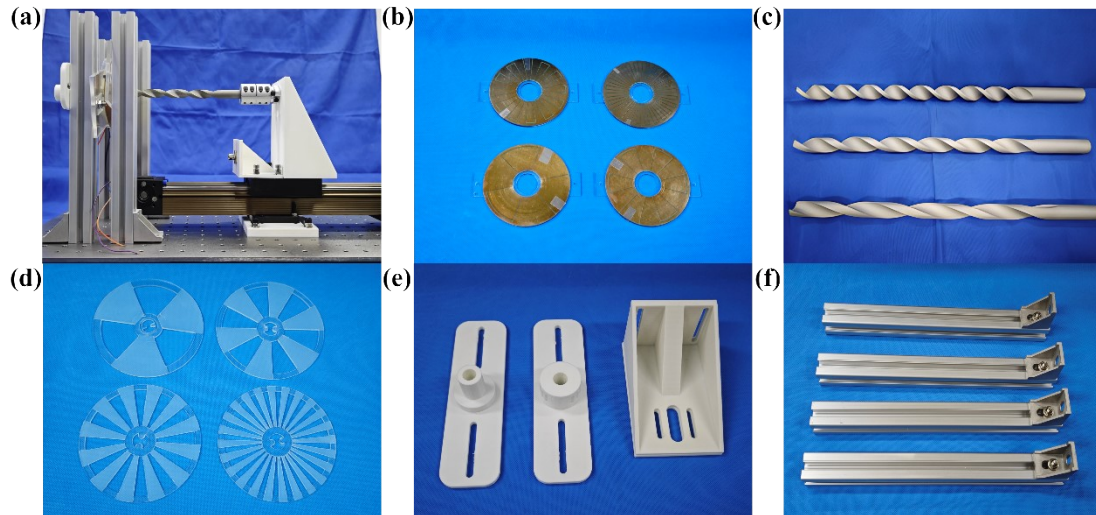

**Fig. S5.** Photographs of (a) a DEF-TENG and its (b) Stator, (c) Chain screw, (d) Rotor, (e) Sleeve, (f) Pedestal.

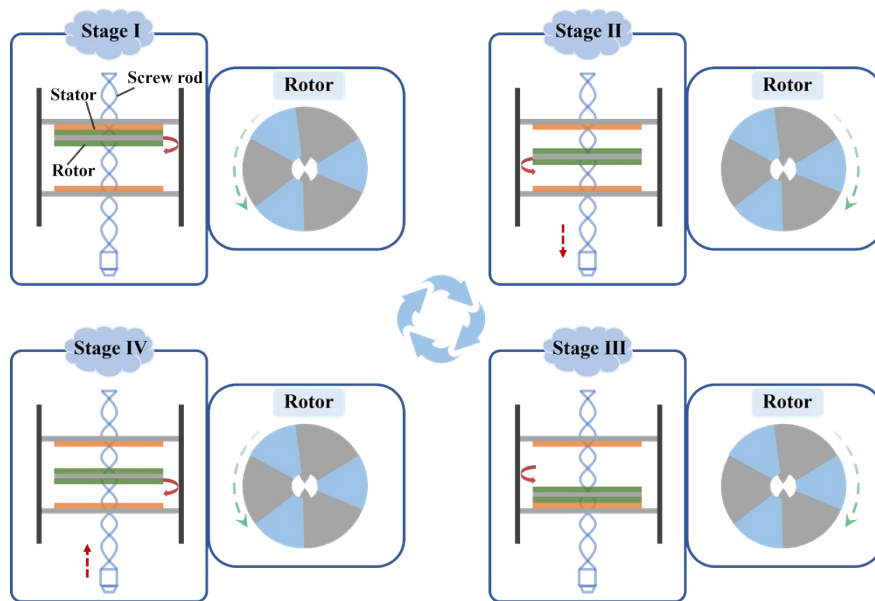

**Fig. S6.** Schematic diagram of the movement process of DEF-TENG.

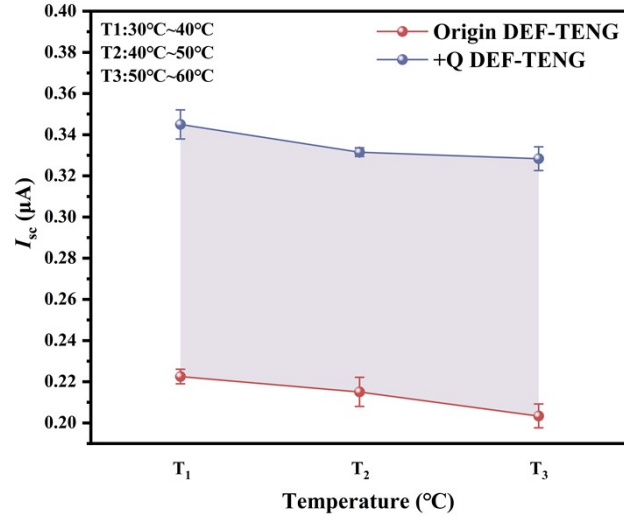

**Fig. S7.** The temperature test of DEF-TENG by short-circuit current.

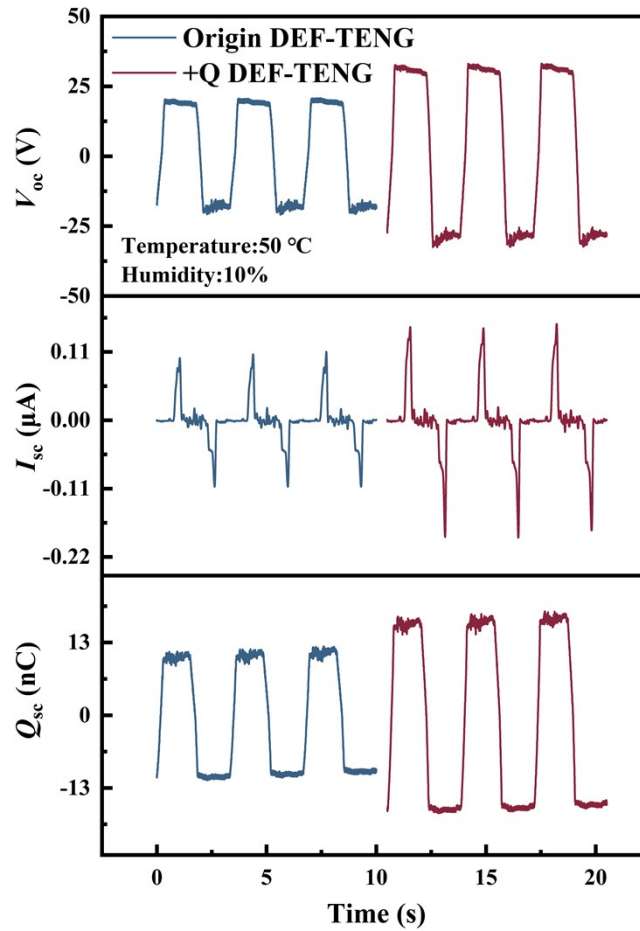

**Fig. S8.** Output waveform of DEF-TENG at the temperature and the humidity are 50°C and 10%.

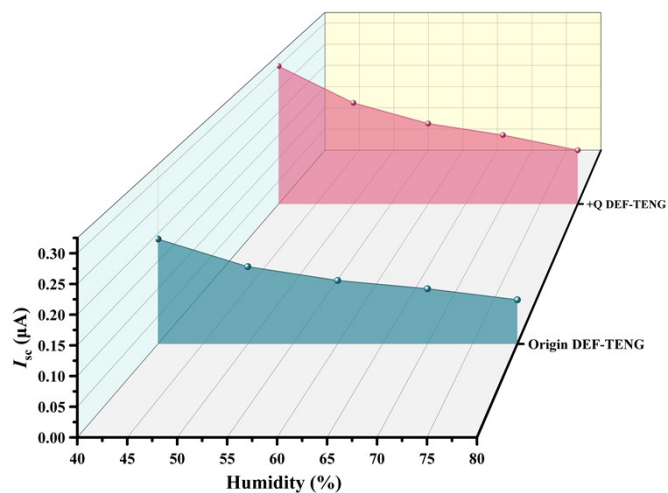

**Fig. S9.** The effects of humidity on the short-circuit current of DEF-TENG.

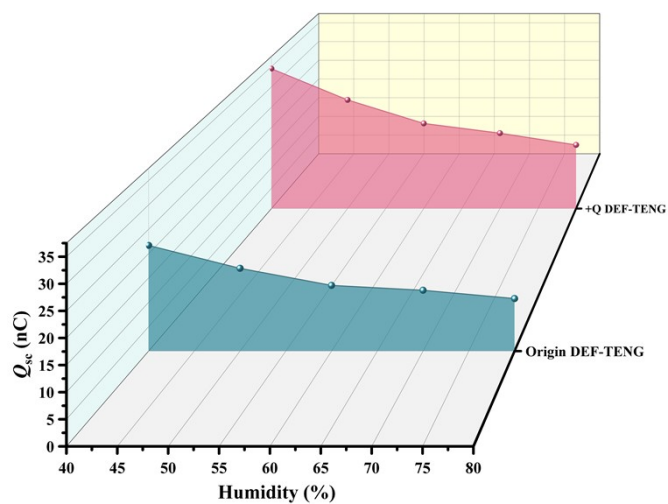

**Fig. S10.** The effects of humidity on the transferred charge of DEF-TENG.

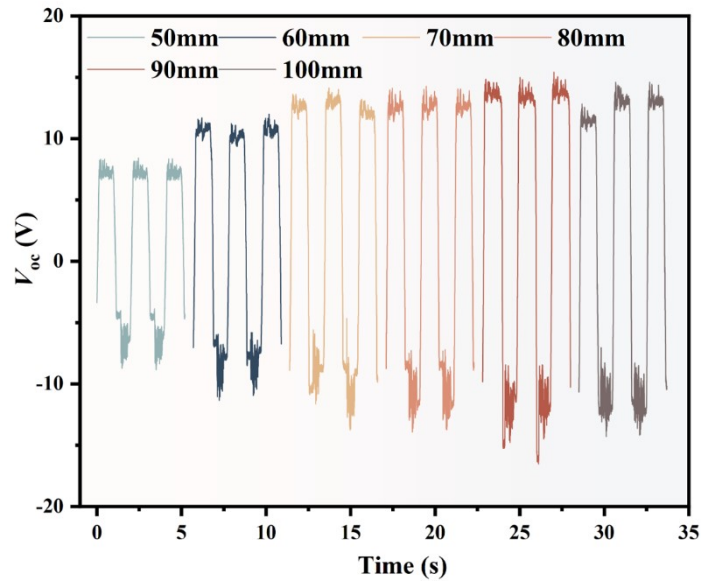

**Fig. S11.** Driving stroke influences on the open-circuit voltage of the DEF-TENG.

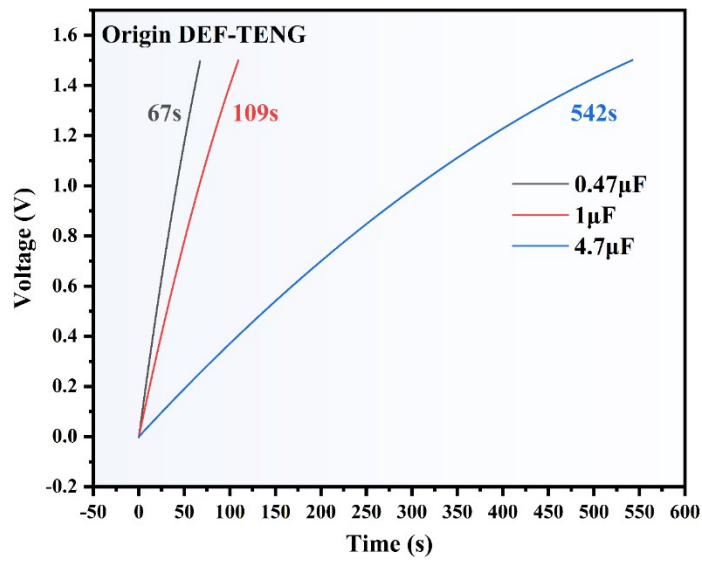

**Fig. S12.** Diagram of the charging curve of origin DEF-TENG for different capacitors.

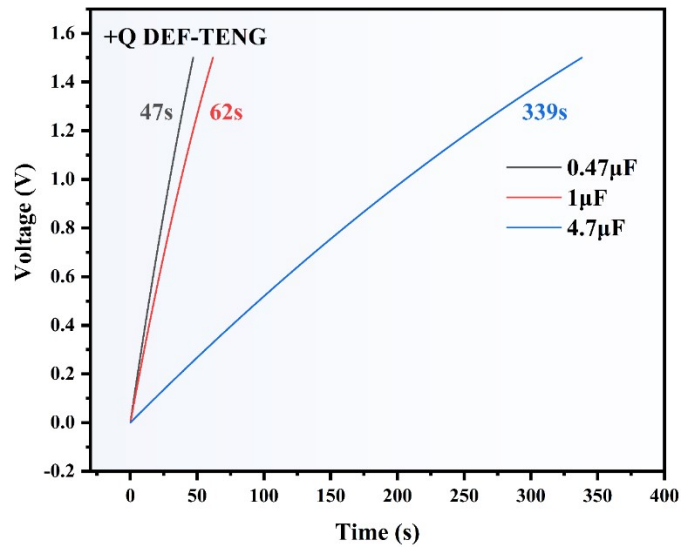

**Fig. S13.** Diagram of the charging curve of +Q DEF-TENG for different capacitors.
